# Supplementary material
Source: publisher figshare collection journal article supplement (https://acs.figshare.com/ndownloader/files/3959584)
Supplement: Supplementary file 1 [file 3959584]

## **Supporting Information**

**For**

# **Exploiting Enzyme Catalysis in Ultra-Low Ion Strength Media For Impedance Biosensing of Avian Influenza Virus Using a Bare Interdigitated Electrode**

*Yingchun Fu, Zachary Callaway, Jacob Lum, Ronghui Wang, Jianhan Lin, Yanbin Li\**

**Table S1.** Comparison of the performance of this work with other H5N1 biosensors.

| No.            | Protocol <sup>[a]</sup>                                 | LDR <sup>[b]</sup>            | DL <sup>[c]</sup>                     |
|----------------|---------------------------------------------------------|-------------------------------|---------------------------------------|
| 1 <sup>1</sup> | Hydrogel based QCM aptasensing                          |                               | 0.0128 HAU in<br>200 µL               |
| 2 <sup>2</sup> | Magnetic nanobeads amplified QCM<br>immunosensing       | 0.128 - 12.8<br>HAU in 300 µL | 0.0128 HAU in<br>300 µL               |
| 3 <sup>3</sup> | Surface Plasmon Resonance<br>aptasensing                | 0.128 - 1.28<br>HAU in 300 µL | 0.128 HAU in<br>300 µL                |
| This<br>work   | Impedance immunosensing based on<br>enzymatic catalysis | 0.001 - 1 HAU in<br>200 µL    | 8 × 10 <sup>-4</sup> HAU<br>in 200 µL |

<sup>[a]</sup> QCM: quartz crystal microbalance. <sup>[b]</sup> LDR: Linear detection range. <sup>[c]</sup> DL: detection limit.

(1) Wang, R.; Li, Y. *Biosens. Bioelectron.* **2013**, *42*, 148-155

(2) Li, D.; Wang, J.; Wang, R.; Li, Y.; Abi-Ghanem, D.; Berghman, L.; Hargis, B.; Lu, H. *Biosens. Bioelectron.* **2011**, *26*, 4146-4154.

(3) Bai, H.; Wang, R.; Hargis, B.; Lu, H.; Li, Y. *Sensors* **2012**, *12*, 12506-12518.

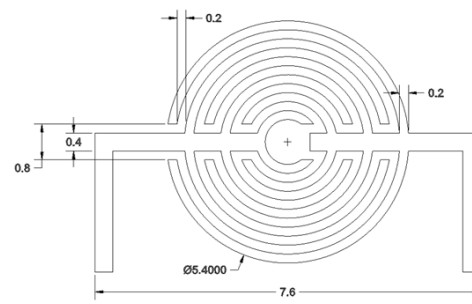

**Figure S1.** The screen-printed interdigitated gold electrode. Dimensions are given in millimeters.

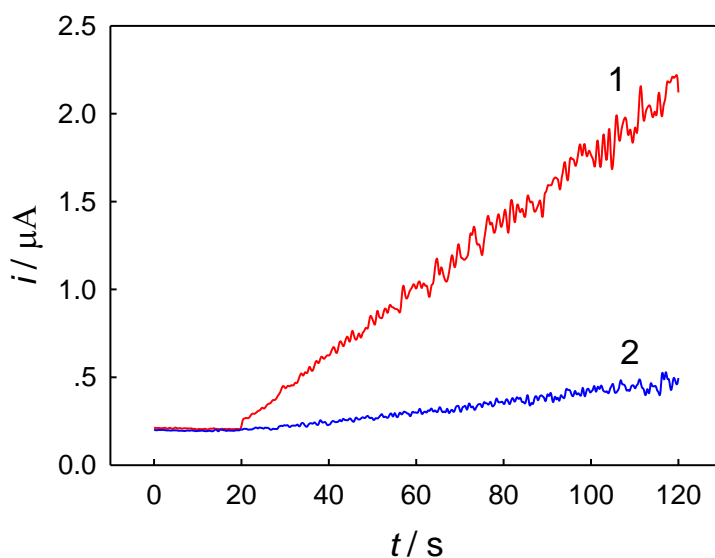

**Figure S2.** Potentiostatic curves of IDAE at 0.7 V in 10 mL stirred PBS after adding 10  $\mu\text{L}$  1  $\text{mg mL}^{-1}$  GOx solution (curve 1) or 10  $\mu\text{L}$  ConA/GOx/AuNPs suspension (curve 2). Briefly, a three-electrode electrochemical cell was used with IDAE as the working electrode. Before adding 10  $\mu\text{L}$  of 1  $\text{mg mL}^{-1}$  GOx solution or 10  $\mu\text{L}$  of BNCs suspension, glucose was added to be 10 mM. Therefore,  $\text{H}_2\text{O}_2$  was continuously produced through the GOx catalysis, leading to a continuously increased current. The slope of the curve should indicate the rate of the increase of the concentration of  $\text{H}_2\text{O}_2$ , and thus, the enzyme activity.

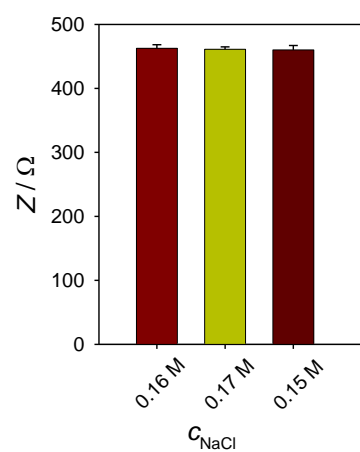

**Figure S3.** Impedance of PBS solution containing NaCl in different concentrations.

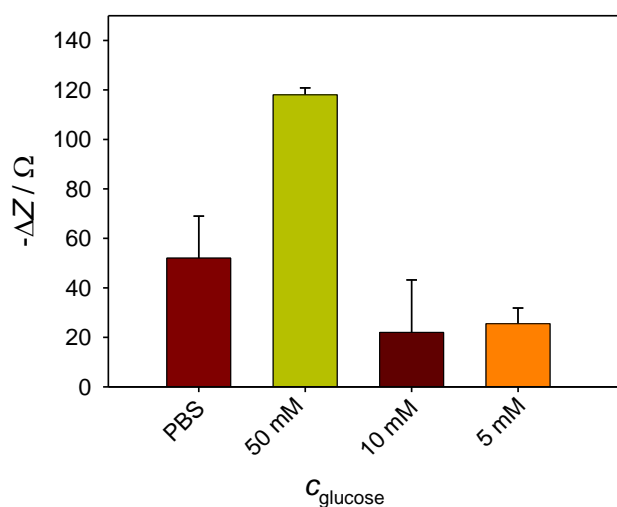

**Figure S4.** Impedance change of the BNCs/H5N1/BSA/aptamer/Au electrode in PBS containing 1 mM  $\text{K}_3\text{Fe}(\text{CN})_6/\text{K}_4\text{Fe}(\text{CN})_6$  before and after immersing in PBS or glucose solutions in different concentrations.

Glucose acts not only as the substrate of GOx, but also as a competitor to the conjugation of ConA and GOx through its affinity to ConA. Generally, higher concentrations of glucose benefit more from the GOx catalysis, however, the glucose can induce detachments of BNCs from the MBs during the washing and detecting. Therefore, glucose concentrations of 5 mM, 10 mM and 50 mM were tested using a similar method to the one mentioned above, as shown in Figure S3. It was found that 5 mM and 10 mM glucose solutions induced impedance changes of  $-25 \pm 6 \Omega$  and  $-22 \pm 21 \Omega$ , which were all less than that in PBS ( $-52 \pm 17 \Omega$ ). This means the ConA-GOx conjugates are stable in glucose solutions with concentrations of 10 mM or lower. It is known that the binding constant between ConA and glycoenzymes is in the order of  $10^5$ - $10^7 \text{ M}^{-1}$ ,<sup>4</sup> while the constant of ConA with glucose is only about  $8 \times 10^2 \text{ M}^{-1}$ .<sup>5</sup> However, 50 mM glucose solution made an impedance decrease ( $118 \pm 3 \Omega$ ) by 66  $\Omega$  more than that in PBS, which indicates an unacceptable instability. Therefore, 10 mM glucose solution was used for the biosensing.

(4) Köneke, R.; Menzel, C.; Ulber, R.; Schügerl, K.; Scheper, T.; Saleemuddin, M.  
*Biosens. Bioelectron.* **1996**, *11*, 1229-1236.

(5) Sato, K.; Imoto, Y.; Sugama, J.; Seki, S.; Inoue, H.; Odagiri, T.; Hoshi, T.; Anzai, J.-i. *Langmuir* **2004**, *21*, 797-799.

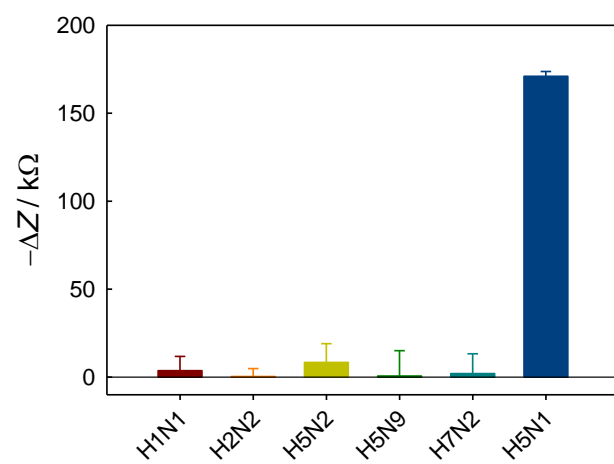

**Figure S5.** Impedance response of the biosensor to AIVs of different subtypes.



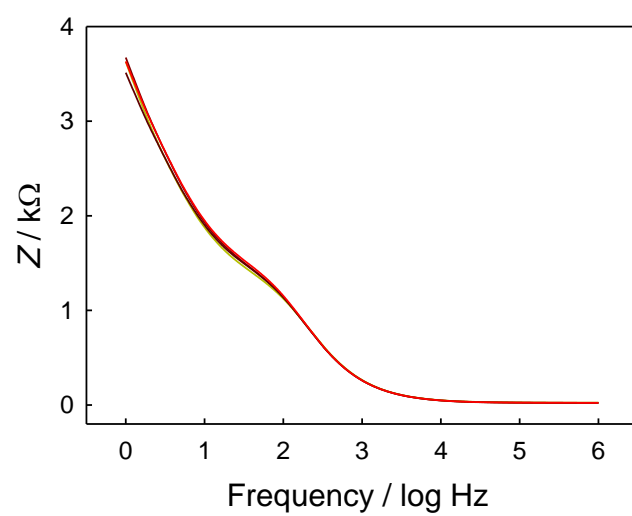

**Figure S5.** Four impedance response curves of the IDAE in PBS containing 1 mM  $\text{K}_3\text{Fe}(\text{CN})_6/\text{K}_4\text{Fe}(\text{CN})_6$  during two-day measurements.
